# Supplementary figures and images for: Blunting Neuroinflammation by Targeting the Immunoproteasome with Novel Amide Derivatives
Source: MDPI journal article supplement (doi:10.3390/ijms241310732), 2023-06-27

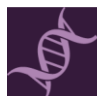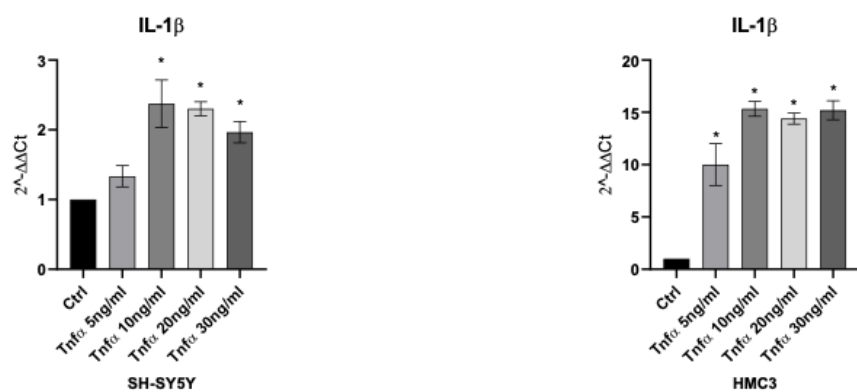

**Figure S1.** TNF- $\alpha$  dose was titrated against the effects on IL1- $\beta$  expression.

Supplement: s1 [file s1]
